1 **TITLE PAGE**

2 ***Manuscript title***

3 Sigh breathing rhythm depends on intracellular calcium oscillations in a population of inspiratory  
4 rhythmogenic preBötzinger complex neurons in mice

5 ***Authors***

6 Daniel S. Borrus<sup>1</sup>, Cameron J. Grover<sup>1</sup>, Gregory D. Conradi Smith<sup>1,2,\*</sup>, and Christopher A. Del  
7 Negro<sup>1,2,\*</sup>

8 ***Author affiliations***

9 1 Department of Applied Science and Neuroscience, William & Mary, Williamsburg, VA  
10 23185

11 2 Conradi Smith and Del Negro contributed equally.

12 ***Co-corresponding authors***

13 Christopher A. Del Negro, Ph.D., Integrated Science Center, 540 Landrum Dr. Williamsburg,  
14 VA, 23185, tel. 757.790.9063, [cadeln@wm.edu](mailto:cadeln@wm.edu)

15 Gregory D. Conradi Smith, Ph.D., Integrated Science Center, 540 Landrum Dr. Williamsburg,  
16 VA, 23185, tel. 757. 871. 8638, [gdsmit@wm.edu](mailto:gdsmit@wm.edu)

17 ***Preprint servers***

18 Not applicable (yet)

19 ***Classification***

20 BIOLOGICAL SCIENCES; Neuroscience

21 ***Keywords***

22 respiration, central pattern generator, eupnea, calcium signaling

23 **ABSTRACT**

24 The preBötzinger Complex (preBötC) of the lower brainstem generates two breathing-related  
25 rhythms: one for inspiration on a timescale of seconds and another that produces larger  
26 amplitude sighs on the order of minutes. Their underlying mechanisms and cellular origins  
27 remain incompletely understood. We resolve these problems via a joint experiment and  
28 modeling approach. Blocking purinergic gliotransmission does not perturb either rhythm and  
29 imaging experiments show that both rhythms emanate from the same glutamatergic neuron  
30 population. We hypothesized that these two disparate rhythms emerge in tandem wherein  
31 recurrent excitation gives rise to inspiratory rhythm while a calcium oscillator generates sighs;  
32 there is no obligatory role for gliotransmission, hyperpolarization activated mixed cationic  
33 current ( $I_h$ ) in neurons, or synaptic inhibition-mediated coupling of separate populations. We  
34 developed a mathematical model that instantiates our working hypothesis. Tests of model  
35 predictions validate the single-population rhythmogenic framework, reproducing disparate  
36 breathing-related frequencies and the ability for inspiratory and sigh rhythms to be separately  
37 regulated in support of respiration under a wide array of conditions. Here we show how a single  
38 neuron population exploits two cellular tool-kits: one involving voltage-dependent membrane  
39 properties and synaptic excitation for inspiratory breathing (eupnea) and an intracellular  
40 biochemical oscillator for sighs, which ventilate and maintain optimal function in the compliant  
41 mammalian lung.

## 42 **SIGNIFICANCE STATEMENT**

43 Breathing consists of two vital rhythms: one for eupnea that serves periodic physiological gas  
44 exchange and the other for sighs, which are larger breaths that occur minutes apart and serve  
45 to optimize pulmonary function. These rhythms with disparate frequencies emerge via a  
46 mechanism that is simpler than previously envisaged: it results from one neuron population (not  
47 two as previously thought) without need for gliotransmission or synaptic inhibition-mediated  
48 coupling of neuronal populations. We show that a low-frequency intracellular calcium oscillation  
49 underlies sighs and functions in parallel with the higher-frequency voltage-dependent network  
50 oscillation that drives eupnea. Exploiting two separate cellular tool kits enables quasi-  
51 independent breathing rhythms, which are unique features of breathing in mammals with  
52 compliant lungs.

53

## 54 MAIN TEXT

### 55 *Introduction*

56 Central pattern generator (CPG) circuits produce the underlying rhythm and rudimentary motor  
57 pattern for rhythmic behaviors (1). In mammals, depending on context, the locomotor CPG  
58 produces either walking, running, or bounding where each form of locomotion is mutually  
59 exclusive (2); the oromotor CPG produces either chewing, lapping, or swallowing where, again,  
60 one form of ingestive behavior precludes the others (3, 4). The breathing CPG, however,  
61 generates two rhythms in tandem: one for eupnea to ventilate the lungs on a second-to-second  
62 basis (~3 Hz in rodents to ~0.2 Hz in humans) and another for sighs to optimize pulmonary  
63 function with periodicity on the order of minutes (0.5-5 min<sup>-1</sup> in rodents to ~0.2 min<sup>-1</sup> in humans)  
64 (5). We investigated their underlying mechanisms to elucidate the neural origins of breathing  
65 and advance understanding of CPGs in general.

66 Eupnea and sigh are both forms of inhalation and both emanate from the preBötzinger Complex  
67 (preBötC) of the lower brainstem (6, 7). The active phase of eupnea, inspiration, initiates due to  
68 recurrent excitation among glutamatergic preBötC interneurons (8, 9) and terminates due to  
69 refractory mechanisms including synaptic depression and recruitment of neural activity-  
70 dependent outward currents (10–12).

71 The sigh mechanism is less clear but may involve calcium (Ca<sup>2+</sup>) oscillations because it is  
72 relatively voltage-insensitive in *in vitro* models of breathing and can be disrupted by antagonists  
73 of voltage-gated Ca<sup>2+</sup> channels, intracellular Ca<sup>2+</sup> release, or Ca<sup>2+</sup> chelation (7, 13, 14). One  
74 cogent model of the embryonic system posited a discrete neuron population that generates sigh  
75 rhythm via Ca<sup>2+</sup> oscillations that depend on hyperpolarization-activated mixed cationic current  
76 (*I<sub>h</sub>*). Also, a discrete neuron population generating inspiratory rhythm via voltage-dependent  
77 persistent Na<sup>+</sup> current (*I<sub>NaP</sub>*) putatively synchronizes with the sigh oscillator through chloride-  
78 mediated synaptic inhibition (13). The veracity of the model depends on: i) the existence of  
79 dedicated sigh and inspiratory neuron populations, ii) *I<sub>h</sub>* being sigh rhythmogenic, iii) *I<sub>NaP</sub>* being  
80 inspiratory rhythmogenic, and iv) synaptic inhibition coupling the two populations. Yet, all four  
81 stipulations are problematic.

82 First, the literature is contradictory regarding whether dichotomous eupnea- and sigh-  
83 specialized neuron populations exist in the preBötC (15, 16); furthermore, a more recent report  
84 suggests that preBötC astrocytes are sigh rhythmogenic (17). Second, experimental data are

85 unresponsive regarding a rhythmogenic role for  $I_{NaP}$  in inspiration (18–22). Third, blocking  $I_h$   
86 stops sigh rhythm in the embryonic preBötC (13) but this observation has not been corroborated  
87 in the preBötC postnatally. Lastly, synaptic inhibition is not necessary to coordinate inspiratory  
88 and sigh oscillations in the slice model of rhythmogenesis postnatally (23).

89 We exploited rhythmically active slice preparations postnatally to address the unresolved issues  
90 recapped above, constructed a mathematical model of inspiratory and sigh rhythmogenesis,  
91 and then evaluated its testable predictions. We posit that a recurrent excitation-based network  
92 oscillator generates inspiration while interactions between plasma membrane (PM)  $Ca^{2+}$  fluxes  
93 and  $Ca^{2+}$  excitability of endoplasmic reticulum (ER) drive sighs. Disparate mechanisms enable  
94 inspiratory and sigh rhythms to operate quasi-independently within a single neuronal population  
95 tasked with maintaining functionality of compliant mammalian lungs and adjusting breathing for  
96 different physiological contexts.

## 97 **Results**

### 98 Inspiratory and sigh rhythms can be separately modulated

99 Slice preparations that retain the preBötC remain rhythmically active *in vitro* and generate  
100 breathing related motor output via the hypoglossal (XII) nerve. We monitored inspiratory and  
101 sigh frequency via preBötC field recordings and XII motor output while manipulating the  
102 baseline membrane potential of preBötC neurons via artificial cerebrospinal fluid (aCSF)  
103 extracellular  $K^+$  concentration ( $[K^+]_o$ ) (Fig. 1A). Mean inspiratory frequency measured  $0.14 \pm$   
104  $0.05$  Hz ( $N = 19$ ) at  $9$  mM  $[K^+]_o$  aCSF. Decreasing  $[K^+]_o$  slowed inspiratory frequency  
105 incrementally such that at  $3$  mM  $[K^+]_o$  it measured  $0.009 \pm 0.011$  Hz ( $N = 9$ ) or zero ( $N = 11$ )  
106 (Fig. 1B, left). These data align with previous studies showing that baseline membrane  
107 excitability governs inspiratory frequency (24, 25), consistent with a recurrent excitation-based  
108 network oscillator as its core underlying mechanism (26–28, 12). Mean sigh frequency  
109 measured  $0.66 \pm 0.17$   $\text{min}^{-1}$  ( $N = 13$ ) at  $9$  mM  $[K^+]_o$  (Fig. 1B, right). Decreasing  $[K^+]_o$  slowed the  
110 sigh frequency incrementally such that at  $3$  mM it measured  $0.26 \pm 0.08$   $\text{min}^{-1}$  ( $N = 5$ ). Sigh  
111 rhythm was 19-fold less sensitive to changes in  $[K^+]_o$  than inspiratory rhythm (relative frequency  
112 increase of  $m = 19$ ,  $r^2 = 0.94$ ,  $p = 3.6 \times 10^{-4}$ ) (Fig. 1C).

113 Neuromedin B (NMB) is a bombesin-like peptide associated with sigh regulation (29) (Fig. 1D).  
114 We meta-analyzed NMB effects on inspiratory and sigh frequency from Li *et al.* (28). Sigh  
115 frequency increased from  $4.5 \pm 1.6$   $\text{min}^{-1}$  in control to  $8.3 \pm 1.6$   $\text{min}^{-1}$  following  $10$  nM NMB and

116 to  $9.7 \pm 2.2 \text{ min}^{-1}$  following 30 nM NMB ( $r^2 = 0.58$ ,  $p = 5.8 \times 10^{-5}$ ) (Fig. 1E, right). We analyzed  
117 inspiratory frequency via all *events*, i.e., both standalone inspiratory bursts and sigh bursts,  
118 which typically build off an inspiratory burst with very short latency ( $\lesssim 1 \text{ s}$ ) (7, 23). Control  
119 inspiratory (event) frequency of  $0.25 \pm 0.03 \text{ Hz}$  remained unaffected by 10 nM NMB ( $0.25 \pm 0.04$   
120 Hz) and 30 nM NMB ( $0.24 \pm 0.05 \text{ Hz}$ ) (Fig. 1E, left). Comparing the change in inspiratory (event)  
121 frequency to the change in sigh frequency yields a flat line ( $m = 0$ ,  $r^2 = 6.4 \times 10^{-3}$ ,  $p = 0.73$ )  
122 (Fig. 1F), indicating that sigh rhythm can be modulated without changing inspiratory rhythm  
123 frequency (14). These data suggest that inspiratory and sigh rhythms have different  
124 mechanisms.

### 125 Purinergic signaling is not necessary for sigh rhythm generation

126 One possibility is that two discrete rhythmogenic mechanisms are embodied in different cell  
127 populations, neural and/or non-neural (17). Astrocytes can generate intracellular  $\text{Ca}^{2+}$   
128 oscillations and gliotransmission via purinergic P2 receptors modulates inspiratory preBötC  
129 rhythms (30–32), which suggests astrocytes communicating with preBötC neurons via  
130 purinergic P2 receptors is a feasible mechanism for sigh rhythmogenesis.

131 We monitored preBötC neurons derived from progenitors that express the transcription factor  
132 *Dbx1* (hereafter: Dbx1 neurons), which comprise the inspiratory rhythmogenic preBötC core  
133 (33–35). Multiphoton imaging of membrane-bound GCaMP6f in Dbx1;Ai148 mouse slices  
134 produced measurable  $\text{Ca}^{2+}$  transients simultaneously recorded with XII motor output (Fig.  
135 S1A,B). Blocking the spectrum of P2 receptors via a cocktail of antagonists (50  $\mu\text{M}$  PPADS, 50  
136  $\mu\text{M}$  suramin, 10  $\mu\text{M}$  TNP-ATP, 10  $\mu\text{M}$  MRS2179, and 10  $\mu\text{M}$  MRS2578) did not modify the  
137 frequency of either inspiratory rhythm ( $0.27 \pm 0.06 \text{ Hz}$  in control vs.  $0.26 \pm 0.07 \text{ Hz}$  in P2  
138 antagonist cocktail,  $p = 0.41$ ) or sigh rhythm ( $0.73 \pm 0.22 \text{ min}^{-1}$  in control vs.  $0.74 \pm 0.18 \text{ min}^{-1}$  in  
139 P2 antagonist cocktail,  $p = 0.87$ ) (Fig. S1C). A parallel experiment employed the highly selective  
140 P2Y<sub>1</sub> antagonist MRS2279 because recent evidence in preprint form purports that  
141 gliotransmission specifically via P2Y<sub>1</sub> receptors is obligatory for sigh rhythmogenesis *in vitro*  
142 (17). Bath-applied 20  $\mu\text{M}$  MRS2279 had no effect on either inspiratory or sigh rhythm  
143 (inspiratory rhythm:  $0.20 \pm 0.04 \text{ Hz}$  in control vs.  $0.26 \pm 0.06 \text{ Hz}$  in MRS2279,  $p = 0.13$ ; sigh  
144 rhythm:  $0.86 \pm 0.45 \text{ min}^{-1}$  in control vs.  $0.61 \pm 0.28 \text{ min}^{-1}$  in MRS2279,  $p = 0.26$ ) (Fig. S2A-C).

145 We also plotted a histogram of inter-event intervals (Figs. S1D and S2D). In control there are  
146 peaks at 5 s and  $\sim 10$  s that reflect the typical interval between inspiratory bursts and the

147 prolonged interval that follows a sigh, respectively. The distributions remain bimodal with peaks  
148 at ~5 s and ~10 s after blocking purinergic signaling, indicating that P2/P2Y<sub>1</sub> receptor blockade  
149 does not prevent or modify inspiratory and sigh rhythms. In both conditions, peaks near 1 s  
150 reflect the short latency between an inspiratory burst and the subsequent sigh burst (7, 23).

151 Because the sigh rhythm persists unperturbed after blocking purinergic P2 receptor-mediated  
152 signaling, it is unlikely to require gliotransmission, which suggests that astrocytes are not sigh  
153 rhythmogenic.

#### 154 *Sigh and inspiratory rhythms arise from the same neuron population*

155 A previous study reported that sigh-only neurons constitute 5% of the preBötC (15). We  
156 monitored Dbx1 preBötC neurons in Dbx1;Ai148 slices (N = 9) by averaging sweeps of their  
157 Ca<sup>2+</sup> transients triggered by discharge of the XII nerve; 208 of 209 Dbx1 preBötC neurons were  
158 active during both inspiratory and sigh bursts. We applied a one-sided binomial test to  
159 determine the likelihood of results as extreme as ours if sigh-only neurons constitute 5% of the  
160 preBötC ( $H_0: p = 0.05$ ): the probability of detecting a single sigh-only neuron given 209 trials is  
161  $2.65 \times 10^{-4}$ . Therefore, we reject the hypothesis that 5% of preBötC neurons are dedicated to  
162 sigh rhythm, which comports with the absence of sigh-only neurons in ref. (16). In summary, our  
163 observations provide no evidence to support dichotomous inspiratory and sigh-dedicated  
164 neuronal (or glial) populations, but rather, these data suggest both rhythms emerge from the  
165 same excitatory *Dbx1*-derived neuronal population already established as inspiratory  
166 rhythmogenic (33–35).

#### 167 *Intracellular Ca<sup>2+</sup> oscillations produce sigh rhythm*

168 Sigh bursts do not emerge from a voltage-dependent network oscillator (Fig. 1B,C) and Dbx1  
169 preBötC neurons show sigh-related Ca<sup>2+</sup> transients that do not depend on gliotransmission  
170 (Figs. S1 and S2). These observations suggest neuronal Ca<sup>2+</sup> oscillations produce sigh bursts.  
171 A model (13) of the embryonic preBötC posited a similar idea but also depended on  $I_h$ . We  
172 tested its veracity by applying the selective  $I_h$  blocker ZD7288 (50 μM) to postnatal (not  
173 embryonic) slices, which had no effect on sigh frequency ( $0.87 \pm 0.55 \text{ min}^{-1}$  in control vs  $1.12 \pm$   
174  $0.38 \text{ min}^{-1}$  in ZD7288, N = 3, paired t-test  $p = 0.41$ ). In summary, we found that sigh  
175 rhythmogenesis does not depend on  $I_h$  (Fig. S3).

176 We formulated a mathematical model of the preBötC wherein both inspiratory and sigh rhythms  
177 emanate from a single Dbx1 neuron population without an obligatory role for  $I_h$  or chloride-  
178 mediated synaptic inhibition (23) (SI Appendix). The model tracks collective network behavior  
179 via five state variables for neuronal activity ( $\alpha$ ), synaptic depression ( $s$ ), cellular adaptation ( $\theta$ ),  
180 and intracellular  $\text{Ca}^{2+}$  ( $c, c_{tot}$ ). Peaks in the time series of  $\alpha$  represent inspiratory and sigh bursts  
181 (Fig. 2A).

182 The inspiratory subsystem ( $\alpha, s, \theta$ ) represents averaged activity and excitability of the preBötC.  
183 It is a network oscillator that depends on recurrent excitation, i.e.,  $\alpha$  is regenerative during  
184 preinspiration (36, 8, 28, 26) (See SI Appendix section 1, Appendix Figs. 1-4). Inspiratory bursts  
185 terminate by refractory mechanisms including synaptic depression ( $s$ ) and outward currents  
186 recruited by neural activity ( $\theta$ ) (24, 10–12). Burst termination is well-illustrated by trajectory in  
187 ( $s, \theta$ ) phase space where  $s$  decreases (synapses depress) while  $\theta$  increases (outward currents  
188 activate) (Fig. A, right, magenta). During the interburst interval  $s$  recovers faster than  $\theta$  declines  
189 (Fig. 2A, right, cyan); the next inspiratory burst occurs when outward currents fully deactivate.  
190 This three-variable subsystem captures preBötC burst dynamics (see SI Appendix, section 1)  
191 such that it is unnecessary to explicitly model each constituent neuron at present.

192 Figure 2B shows a schematic of the sigh-rhythmogenic  $\text{Ca}^{2+}$  subsystem. Inspiratory bursts  
193 activate voltage-gated  $\text{Ca}^{2+}$  currents yet cytosolic  $\text{Ca}^{2+}$  ( $c$ ) increases only minimally because the  
194 endoplasmic reticulum (ER) sequesters most of the entering  $\text{Ca}^{2+}$  via SERCA pumps (37, 38).  
195 Total  $\text{Ca}^{2+}$  ( $c_{tot}$ ) increases in step with inspiratory rhythm as the ER fills up (Fig. 2A left, orange  
196 trace). In the ( $c, c_{tot}$ ) phase space (Fig. 2A, lower right) the trajectory follows the left (low  $c$ )  
197 branch of the  $c$  nullcline. When the system reaches its left knee (Fig. 2A,  $\star$ ) the replete ER  
198 releases  $\text{Ca}^{2+}$  and the trajectory moves to the right (high  $c$ ) branch of the  $c$  nullcline (rightward  
199 horizontal trajectory, purple arrowhead). The resulting increase in  $c$  evokes  $\text{Ca}^{2+}$ -activated non-  
200 specific cation current ( $I_{CAN}$ ) to trigger the sigh burst (prominent peaks in the  $\alpha$  time series).  
201 During the sigh burst, plasma membrane  $\text{Ca}^{2+}$  ATPase (PMCA) pumps extrude cytosolic  $\text{Ca}^{2+}$ ;  $c$   
202 and  $c_{tot}$  both decrease (purple trace with down then leftward trajectory) and the system returns  
203 to the left (low  $c$ ) branch of the  $c$  nullcline. Very high  $\alpha$  during a sigh increases  $\theta$  beyond its  
204 peak value during inspiratory bursts (Fig. 2A,C red traces).  $\theta$  takes longer to recover from this  
205 elevated level, which explains the post-sigh apnea.

206 The ( $c, c_{tot}$ ) system captures  $\text{Ca}^{2+}$  dynamics within constituent neurons, but can it account for  
207 synchronized oscillation throughout the network? We simulated 400 neurons with action



208 potential-generating capabilities and internal  $\text{Ca}^{2+}$  dynamics as described above. Excitatory  
209 synaptic interactions, which are the basis for recurrent excitation, suffice to synchronize the  $\text{Ca}^{2+}$   
210 oscillations of the constituent neurons (Fig. S4, SI Appendix section 5) such that it is  
211 unnecessary to explicitly model each constituent neuron as we test the veracity of our model for  
212 explaining the dynamics of the biorhythmic inspiratory-sigh system.

### 213 Inspiratory and sigh rhythms can be separately modulated in the model

214 We tested model predictions by simulating the change in cellular excitability that results from  
215 manipulating  $[\text{K}^+]_o$  in the aCSF *in vitro*. The relevant model parameter,  $\gamma_a$ , is the input-output  
216 function attributable to a leak current that determines how close baseline membrane potentials  
217 are to spike threshold. Inspiratory model frequency ranged from quiescence to  $\sim 0.25$  Hz as  $\gamma_a$   
218 varied from 0.1 to 0.4 (akin to varying  $[\text{K}^+]_o$  3 to 9 mM) whereas sigh frequency ranged from 0.38  
219 to  $1.08 \text{ min}^{-1}$  (i.e., 0.006-0.018 Hz, Fig. 2D). Inspiratory rhythm is 20-fold more sensitive to  
220 changes in excitability than sigh rhythm, consistent with experiment (compare Figs. 2D and 1C).

221 We simulated the effects of bombesin-like peptides at the final stage of their Gq-linked signaling  
222 cascade (39) by increasing the inositol 1,4,5-trisphosphate receptor ( $\text{IP}_3\text{R}$ ) release rate via  
223 parameter  $\nu_{\text{ip}3\text{r}}$ . Doing so accelerated sigh frequency from 0.01 to 0.16 Hz without affecting  
224 inspiratory frequency (Fig. 2E), which matches the NMB experiments (compare Figs. 2E to 1F).  
225 Separate mechanisms and modulation govern inspiratory and sigh rhythms.

### 226 Disrupting SERCA activity reduces sigh frequency

227 Partially blocking SERCA (i.e., decreasing  $\nu_{\text{SERCA}}$  from 60 to  $30 \text{ s}^{-1}$ ) counterintuitively increases  
228 sigh frequency but decreases sigh magnitude (Fig. 3A). Both effects are a consequence of how  
229 SERCA activity influences the  $c_{\text{tot}}$  threshold that compels ER  $\text{Ca}^{2+}$  release, marked by the left  
230 knee of the  $c$  nullcline (Fig. 2A  $\star$ , S5B). Sigh frequency is determined by the time required to  
231 refill the ER, which depends on the vertical separation between the knees of the  $c$  nullcline.  
232 Reducing  $\nu_{\text{SERCA}}$  by 50% decreases their vertical separation and thus speeds-up sigh rhythm  
233 (Fig. S5A,B). Further reducing  $\nu_{\text{SERCA}}$  by 80% ( $12 \text{ s}^{-1}$ ) stops sigh rhythmogenesis because the  
234 knee of the  $c$  nullcline crosses the vertical  $c_{\text{tot}}$  nullcline, which now intersects the  $c$  nullcline on  
235 its positively sloped left branch, i.e., oscillations cease via a Hopf bifurcation (Fig. 3A, S5C).

236 Sigh frequency in slices can be determined from preBötC field recordings or via XII motor  
237 output. However, sigh magnitude can only be accurately measured via preBötC field recordings

238 because XII output is filtered by premotor neurons postsynaptic of the preBötC core. We bath  
239 applied 10  $\mu\text{M}$  thapsigargin to partially block SERCA pumps. Sigh frequency increased  $0.8 \pm$   
240  $0.48 \text{ min}^{-1}$  in control vs.  $1.23 \pm 0.90 \text{ min}^{-1}$  in thapsigargin (paired t-test,  $p = 0.04$ ,  $N = 9$ ) (Fig.  
241 3B,C). Sigh burst magnitude decreased by 32% ( $24 \pm 13 \text{ mV-s}$  in control vs.  $16 \pm 11 \text{ mV-s}$  in  
242 thapsigargin, paired t-test,  $p = 0.029$ ,  $N = 5$ ) (Fig. 3B,D). The effect on sigh frequency was  
243 reversible ( $0.8 \pm 0.42 \text{ min}^{-1}$ ); sigh magnitude recovered in three out of the five field recordings  
244 ( $19 \pm 11 \text{ mV-s}$ ) (Fig. 3C,D). These experimental results matched the model predictions for  
245 partial SERCA blockade.

246 Next, we fully blocked SERCA pumps by injecting a high dose of thapsigargin (100  $\mu\text{M}$ )  
247 bilaterally into the preBötC. We microinjected into the preBötC to avoid widespread blockade of  
248 SERCA pumps following bath application. Local microinjection is important in this context  
249 because neurons outside of preBötC that are retained in slices, like the raphé obscurus, are  
250 tonically active and help maintain preBötC excitability (40). Widespread SERCA blockade via  
251 bath application of a high concentration of thapsigargin could impact the preBötC rhythmogenic  
252 network via indirect effects. The drawback is that local injection precludes simultaneous local  
253 field potential recording. Therefore, we assessed sigh rhythm following 100  $\mu\text{M}$  thapsigargin  
254 solely via XII output and thus only analyzed sigh frequency.

255 To establish that our injection micropipettes correctly targeted the preBötC we first injected  
256 bolus of 25 mM  $[\text{K}^+]_o$  aCSF into the preBötC bilaterally. Potassium rapidly and reversibly  
257 increased inspiratory frequency whereas 1% DMSO aCSF, the vehicle, had no effect (Fig. S6).  
258 Thapsigargin (100  $\mu\text{M}$ ) stopped the sigh rhythm ( $N = 3$ ) or decreased it by 81% to  $0.25 \text{ min}^{-1}$  ( $N$   
259  $= 1$ ) (Fig. 3E,F), which recovered in washout (from  $1.52 \pm 0.25 \text{ min}^{-1}$  in control to  $1.17 \pm 0.21$   
260  $\text{min}^{-1}$  in washout).

261 We further measured inter-event intervals as a metric of sigh rhythm. During control conditions  
262 the inter-event interval distribution is bimodal, with a peak at  $\sim 8 \text{ s}$  representing the inspiratory  
263 intervals and a peak at  $\sim 13 \text{ s}$  representing the post-sigh apneas (Fig. 3G). The inter-event  
264 interval histogram became monophasic in the presence of 100  $\mu\text{M}$  thapsigargin; its sole peak at  
265  $\sim 6 \text{ s}$  represents inspiratory intervals; the lack of another peak at  $> 6 \text{ s}$  indicates the cessation of  
266 sigh rhythm. These experimental results matched the model predictions for  $\geq 80\%$  blockade of  
267 SERCA pumps.

## 268 Blocking IP<sub>3</sub>Rs diminishes sigh frequency

269 Attenuating IP<sub>3</sub>R-mediated Ca<sup>2+</sup>-induced Ca<sup>2+</sup> release rate ( $v_{ip3r}$ ) at first decelerates and then  
270 stops the sigh rhythm (Fig. 4A). Decreasing  $v_{ip3r} \leq 40\%$  elevates the critical  $c_{tot}$  that compels  
271 ER Ca<sup>2+</sup> release (Fig. 2A \*), enhancing the vertical separation between the knees of the  $c$   
272 nullcline and slowing-down the sigh rhythm (Fig. 4A, S7A,B).  $v_{ip3r}$  reduction did not affect sigh  
273 burst area as indicated by the  $\int a$  in Fig. 4A. Decreasing  $v_{ip3r} \geq 50\%$  raises the left knee high  
274 enough to cross the vertical  $c_{tot}$  nullcline, which now intersects the  $c$  nullcline on its positively  
275 sloped left branch, i.e., oscillations cease via a Hopf bifurcation (Fig. 4A, S7C).

276 We tested this model prediction in slices by attenuating IP<sub>3</sub>Rs using xestospongine (41, 42),  
277 injected bilaterally into the preBötC. It was impracticable to calibrate xestospongine dose to  
278 mimic 40% vs. 50% attenuation of  $v_{ip3r}$ . Xestospongine (1  $\mu$ M) decreased sigh frequency ( $1.29 \pm$   
279  $0.49 \text{ min}^{-1}$  in control vs.  $0.3 \pm 0.2 \text{ min}^{-1}$  in xestospongine,  $N = 3$ ) or stopped it altogether ( $N = 1$ ),  
280 in broad agreement with model predictions (Fig. 4B,C). The effect was reversible; sigh  
281 frequency returned to  $0.91 \pm 0.48 \text{ min}^{-1}$ .

282 We further measured inter-event intervals as a metric of sigh rhythm. During control conditions  
283 the inter-event interval distribution is bimodal, with a peak at  $\sim 6$  s representing the inspiratory  
284 intervals and a broad peak at  $\sim 12$  s representing the post-sigh apneas (Fig. 4D). Xestospongine  
285 caused the peak  $\sim 12$  s disappear, which indicates the cessation of sigh rhythm.

## 286 **Discussion**

287 Eupnea and sigh rhythms both come from the preBötC (7) but from which cell population(s)?  
288 Furthermore, could the slower rhythm, lacking voltage dependence, depend on glia? How are  
289 the rhythms coupled? Here we resolve these questions by showing that both rhythms emanate  
290 from one neuronal population in the preBötC postnatally with no obligatory role for purinergic  
291 gliotransmission. Membrane properties like  $I_h$  and synaptic inhibition (ref. 23) are not required  
292 for rhythmogenesis or coupling, respectively.

293 We conclude that glia and gliotransmission are not mandatory for sigh rhythmogenesis because  
294 attenuating purinergic P2Y signaling, the dominant means by which astrocytes interact with  
295 preBötC neurons (30–32), did not preclude or modify sigh rhythmogenesis. A recent report in  
296 preprint form showed that blocking gliotransmission at P2Y<sub>1</sub> receptors stops the sigh rhythm *in*  
297 *vitro* but does not stop sighs in adult mice (17). Our conclusion is not incompatible – purinergic

298 gliotransmission is ultimately unnecessary for sigh behavior – but our data *in vitro* are  
299 incongruous. The disparity may be attributable to which populations were monitored. We  
300 recorded Dbx1 neurons in the preBötC core from the rostral surface of 500  $\mu\text{m}$ -thick slices. In  
301 contrast, ref. 17 performed field recordings from the caudal surface of  $\sim 600$   $\mu\text{m}$ -thick slices, in  
302 which the recording site is  $\sim 200$   $\mu\text{m}$  caudal to the preBötC in an area containing phrenic  
303 premotor neurons (6). Therefore, cessation of sigh rhythm suggests that P2/P2Y<sub>1</sub> receptor-  
304 mediated signaling might be critical for premotor transmission of sigh bursts while remaining  
305 dispensable from the standpoint of sigh rhythmogenesis.

306 Our conclusion that glia are not sigh rhythmogenic assumes that signaling is purely purinergic.  
307 However, astrocytes in the trigeminal system facilitate oromotor rhythmogenesis via paracrine  
308 transmission (43). There, S100 $\beta$  secretion neither generates nor synchronizes oscillations but  
309 rather modulates  $I_{\text{NaP}}$ -mediated bursting-pacemaker properties in rhythmogenic trigeminal  
310 interneurons. This mechanism is highly unlikely to apply to sigh rhythmogenesis because  $I_{\text{NaP}}$   
311 bursting-pacemaker neurons oscillate much faster than the sigh rhythm and are not inspiratory  
312 rhythmogenic in the preBötC (18–21).

313 One report found 5% of preBötC neurons were active only during sighs and postulated them as  
314 sigh rhythmogenic (15). A contemporary report found the opposite, namely that all preBötC  
315 neurons participated in both sighs and inspiratory bursts (16). We monitored Dbx1 preBötC  
316 neurons via photonic imaging; the vast majority were bi-rhythmically active. We conclude that  
317 inspiratory and sigh rhythms come from a single population of Dbx1 preBötC neurons.

318 One neuron population produces two rhythms by engaging separate cellular tool kits. The faster  
319 inspiratory rhythm employs recurrent synaptic interactions (9, 27, 28, 33, 34); it is a canonical  
320 network oscillator (1) whose bursts emerge on the order of seconds. Nevertheless, each  
321 constituent neuron hosts an intracellular signaling system linked to plasma membrane  $\text{Ca}^{2+}$  flux  
322 as well as ER  $\text{Ca}^{2+}$  storage and release mechanisms. That system can produce biochemical  
323 oscillations much slower than inspiration and trigger neural bursts substantially larger than  
324 inspiration via  $\text{Ca}^{2+}$ -induced  $\text{Ca}^{2+}$  release that evokes the burst-generating inward current,  $I_{\text{CAN}}$ .  
325 The two mechanisms can comfortably coexist in preBötC neurons because the underlying  
326 network oscillator and a biochemical oscillator are fundamentally different and can be separately  
327 regulated by manipulating either membrane excitability (inspiration) or Gq-mediated intracellular  
328 signaling (sigh).

329 The two oscillators have a second point of intersection: plasma membrane  $\text{Ca}^{2+}$  influx. Network  
330 activity increases  $\text{Ca}^{2+}$  influx leading to a modest increase  $\text{Ca}^{2+}$  oscillation frequency. This  
331 confers (minimal) voltage dependence on the sigh oscillation, which is approximately 5% as  
332 sensitive as inspiratory rhythm to changes in membrane excitability (see Figs. 1B,C and 2D).  
333 Activity dependent  $\text{Ca}^{2+}$  influx may also promote synchronization of intracellular  $\text{Ca}^{2+}$  oscillations  
334 across the neural population. In the spiking model, ionotropic synaptic signaling can maintain  
335 synchronized intracellular  $\text{Ca}^{2+}$  oscillations underlying the sigh rhythm (Fig. S4 and SI Appendix  
336 Fig. 12). In the biological system, additional mechanisms are available including metabotropic  
337 glutamatergic transmission (21) as well paracrine signaling mechanisms yet to be identified.

338 The evolution of the compliant lung (one that expands and contracts) in mammals introduced  
339 the physiological need for regularly timed large-volume breaths to reinflate collapsed or  
340 collapsing alveoli. As the breathing system evolved from fish to reptiles it produced an  
341 inexorable inspiratory oscillator but not a sigh rhythm. As the physiological need arose, rather  
342 than recruit a new brain region for sighs, we posit that the mammalian nervous system adapted  
343 the inspiratory rhythmogenic neurons to produce a low frequency, large amplitude oscillation  
344 that depended on a separate intracellular tool kit in the same constituent Dbx1 preBötC  
345 neurons.

346 This work demonstrates the operation of a bi-rhythmic canonical CPG system with relevance to  
347 health and physiology. Its dynamics can be understood via a low-dimensional dynamical system  
348 with fast and slow time scales.

## 349 **Materials and methods**

### 350 Ethical approval and animal use

351 The Institutional Animal Care and Use Committee at William & Mary approved these protocols,  
352 which conform to the policies of the Office of Laboratory Animal Welfare (National Institutes of  
353 Health, Bethesda, MD, USA) as well as the guidelines of the National Research Council (44).  
354 Mice (described below) were maintained on a 12-hour light / 12-hour dark cycle at 23° C and  
355 were fed *ad libitum* with free access to water. The mice are provided with several forms of  
356 enrichment including opaque igloo shelters, wood blocks, and nest materials.

357 Multi-photon experiments employed Cre-driver mice generated by inserting an *IRES-CRE-pGK-*  
358 *Hygro* cassette in the 3' untranslated region of the *Developing brain homeobox 1* (i.e., *Dbx1*)

359 gene, which we refer to as *Dbx1<sup>Cre</sup>* mice (45) (IMSR Cat# EM:01924, RRID:IMSR\_EM:01924).  
360 We crossed female *Dbx1<sup>Cre</sup>* mice with males from a reporter strain featuring Cre-dependent  
361 expression of the fluorescent Ca<sup>2+</sup> indicator GCaMP6f dubbed Ai148 by the Allen Institute (46)  
362 (IMSR Cat# JAX:030328, RRID:IMSR\_JAX:030328). Their offspring, *Dbx1;Ai148* mice, express  
363 GCaMP6f in *Dbx1*-derived cells, the majority of which are neurons (47).

#### 364 Breathing-related measurements in vitro

365 Mouse pups of both sexes were anesthetized by hypothermia and killed by thoracic transection  
366 at postnatal day 0 to 4. Neuraxes were removed in artificial cerebrospinal fluid (aCSF)  
367 containing (in mM): 124 NaCl, 3 KCl, 1.5 CaCl<sub>2</sub>, 1 MgSO<sub>4</sub>, 25 NaHCO<sub>3</sub>, 0.5 NaH<sub>2</sub>PO<sub>4</sub>, and 30  
368 dextrose equilibrated with 95% O<sub>2</sub>-5% CO<sub>2</sub>, pH 7.4. Isolated neuraxes were glued to an agar  
369 block and then cut in the transverse plane to obtain a single 500- $\mu$ m-thick slice that exposed the  
370 preBötC at its rostral face. Atlases for wild-type and *Dbx1* reporter mice show that the loop of  
371 the inferior olive and the semi-compact division of the nucleus ambiguus collocate with the  
372 preBötC during early postnatal development (48, 49). Slices were then perfused with aCSF at  
373 28° C in a recording chamber below a fixed-stage microscope.

374 We elevated extracellular K<sup>+</sup> concentration ([K<sup>+</sup>]<sub>o</sub>) to 9 mM to increase preBötC excitability (50).  
375 Inspiratory-related motor output was recorded from the hypoglossal (XII) nerve rootlets, which  
376 are captured in transverse slices along with the XII motoneurons and their axon projections to  
377 the nerve rootlets, using suction electrodes and a differential amplifier. We obtained field  
378 potential recordings by forming a seal over the preBötC with a suction electrode at the rostral  
379 slice surface. Amplifier gain was set at 1000. Signals were acquired digitally at 1 kHz while low-  
380 pass filtering at 300 Hz. XII and preBötC bursts were full-wave rectified and smoothed for  
381 display and quantitative analyses of burst events.

382 To apply drugs locally in the preBötC we fabricated micropipettes from borosilicate glass (OD:  
383 1.5 mm, ID: 0.86 mm) and filled them with either thapsigargin or xestospongine (see below). Two  
384 pipettes were inserted 200  $\mu$ m deep into the preBötC on both sides of slice preparations. We  
385 microinjected the drugs using 7-9 psi pressure pulses lasting 8 ms in duration, delivered at a  
386 frequency of 5-7 Hz. Pipettes for local drug application in the preBötC precluded simultaneous  
387 local field recordings; we monitored preBötC activity in those experiments only via XII nerve  
388 recordings.

#### 389 Multi-photon imaging

390 We imaged cytosolic  $\text{Ca}^{2+}$  concentration in neurons contained in slices from Dbx1;Ai148 mice  
391 using a multi-photon laser-scanning confocal microscope (Thorlabs, Newton, NJ) equipped with  
392 a Nikon water immersion objective (20x, 1.0 numerical aperture). Illumination was provided by  
393 an ultrafast tunable laser with a power output of 950 mW at 940 nm, 80-MHz pulse frequency,  
394 and 100-fs pulse duration (Coherent Chameleon Discovery, Santa Clara, CA). We scanned  
395 Dbx1;Ai148 mouse slices over the preBötC and collected time series images using a non-  
396 descanned photomultiplier tube detector at 15 Hz. Each frame reflects one-way raster scans  
397 with a resolution of 256 x 256 pixels (116 x 116  $\mu\text{m}$ ). Fluorescence data were collected using  
398 Thorlabs LS 4.1 software and then analyzed using MATLAB 2021a (MathWorks, Natick, MA,  
399 RRID:SCR\_001622).

400 First, we calculated the average fluorescence intensity for all pixels in each frame of the time  
401 series. The mean fluorescence intensity was used as an index of overall network activity during  
402 the time series. The bursts of fluorescence intensity were periodic and the cycle periods were  
403 normally distributed. We use the 95% confidence interval (CI) of cycle periods to define the high  
404 frequency (short cycle period) and low frequency (long cycle period) limits of a window in  
405 frequency space. Next, our script performs a fast Fourier transform on the time series for each  
406 pixel. The maximum power from the previously defined window in frequency space is mapped to  
407 the corresponding pixel in a new, processed two-dimensional image.

408 We calculate the mean and standard deviation of the power from each pixel in the new  
409 processed image (Fig. S1A). Rhythmically active pixels will have power far greater than the  
410 average. Therefore, all pixels with intensity less than mean + 2\*SD are set to zero. The  
411 remaining contiguous pixel sets, whose area exceeds 8  $\mu\text{m}^2$ , are retained as ROIs. The  $\text{Ca}^{2+}$   
412 fluoresce changes within those ROIs, obtained from the original time series, are reported using  
413 the equation  $\frac{(F_i - F_o)}{F_o}$ , i.e.,  $\frac{\Delta F}{F_o}$ , where  $F_i$  is the instantaneous average fluorescence intensity for all  
414 pixels within a given ROI and  $F_o$  is the average fluorescence intensity of all pixels within that  
415 same ROI averaged over the entire time series.

#### 416 Inspiratory burst and sigh burst detection

417 We distinguished a sigh burst from an inspiratory burst in the preBötC field recordings by  
418 measuring burst area and the duration of the interval between the putative sigh burst and the  
419 subsequent inspiratory burst. Sigh bursts are typically  $\geq 2x$  larger in area than inspiratory bursts.  
420 Additionally, a prolonged interval between the putative sigh and the following inspiratory burst,

421 typically 1.3x the average inter-event interval for inspiratory bursts, confirms that the event in  
422 question is a sigh burst.

### 423 Pharmacology

424 We employed the following drugs to block neuron-glia signaling: PPADS (50  $\mu$ M), suramin (50  
425  $\mu$ M), TNP-ATP (10  $\mu$ M), MRS2179 (10  $\mu$ M), and MRS2578 (10  $\mu$ M). We used thapsigargin (10-  
426 100  $\mu$ M) and xestospongine C (1  $\mu$ M) to interrogate intracellular  $Ca^{2+}$  sequestration and release.  
427 We employed ZD7288 (50  $\mu$ M) to block  $I_h$ . Thapsigargin, xestospongine, and ZD7288 were  
428 dissolved in dimethyl sulfoxide (DMSO) to generate stock solutions. Final concentration of  
429 DMSO in aCSF never exceeded 1% by volume. All drugs were obtained from Millipore Sigma  
430 (Burlington, MA).

### 431 Numerical simulations and data analysis

432 We used MATLAB 2021a and XPPAUT software to simulate and analyze ordinary differential  
433 equation models. Numerical integration was performed using Euler's method with a time step of  
434 0.01 ms in MATLAB. XPPAUT was used with default solver settings. The SI Appendix describes  
435 the modeling work in detail. The code and equations are in the public repository on ModelDB  
436 (Accession No. 267252).

437 Error bars show standard deviation. P-values for regression statistics are calculated using the  $F$ -  
438 test.

### 439 **ACKNOWLEDGEMENTS AND FUNDING SOURCES**

440 This work was supported by the National Institutes of Health grants R01-HL104127 (PI: CA Del  
441 Negro) and AT010816 (PIs: Conradi Smith and Del Negro), and National Science Foundation  
442 grant DMS 1951646 (PI: Conradi Smith).

443



## 444 REFERENCES

- 445 1. S. Grillner, A. El Manira, Current principles of motor control, with special reference to  
446 vertebrate locomotion. *Physiol. Rev.* **100**, 271–320 (2020).
- 447 2. O. Kiehn, Decoding the organization of spinal circuits that control locomotion. *Nat. Rev.*  
448 *Neurosci.* **17**, 224–238 (2016).
- 449 3. K.-G. Westberg, A. Kolta, “The trigeminal circuits responsible for chewing” in *International*  
450 *Review of Neurobiology*, (Elsevier, 2011), pp. 77–98.
- 451 4. M. M. B. Costa, Neural control of swallowing. *Arq. Gastroenterol.* **55**, 61–75 (2018).
- 452 5. P. Li, K. Yackle, Sighing. *Curr. Biol.* **27**, R88–R89 (2017).
- 453 6. C. A. Del Negro, G. D. Funk, J. L. Feldman, Breathing matters. *Nat. Rev. Neurosci.* (2018)  
454 <https://doi.org/10.1038/s41583-018-0003-6> (May 9, 2018).
- 455 7. S. P. Lieske, M. Thoby-Brisson, P. Telgkamp, J. M. Ramirez, Reconfiguration of the neural  
456 network controlling multiple breathing patterns: eupnea, sighs and gasps. *Nat. Neurosci.* **3**,  
457 600–607 (2000).
- 458 8. A. Wallen-Mackenzie, *et al.*, Vesicular glutamate transporter 2 is required for central  
459 respiratory rhythm generation but not for locomotor central pattern generation. *J. Neurosci.*  
460 **26**, 12294–12307 (2006).
- 461 9. K. Kam, J. W. Worrell, C. Ventalon, V. Emiliani, J. L. Feldman, Emergence of population  
462 bursts from simultaneous activation of small subsets of preBötzinger Complex inspiratory  
463 neurons. *J. Neurosci.* **33**, 3332–3338 (2013).
- 464 10. A. Kottick, C. A. Del Negro, Synaptic depression influences inspiratory–expiratory phase  
465 transition in Dbx1 Interneurons of the preBötzinger Complex in neonatal mice. *J. Neurosci.*  
466 **35**, 11606–11611 (2015).
- 467 11. R. A. Krey, A. M. Goodreau, T. B. Arnold, C. A. Del Negro, Outward currents contributing to  
468 inspiratory burst termination in preBötzinger Complex neurons of neonatal mice studied in  
469 vitro. *Front. Neural Circuits* **4**, 124 (2010).
- 470 12. C. Guerrier, J. A. Hayes, G. Fortin, D. Holcman, Robust network oscillations during  
471 mammalian respiratory rhythm generation driven by synaptic dynamics. *Proc. Natl. Acad.*  
472 *Sci.* **112**, 9728–9733 (2015).
- 473 13. N. Toporikova, M. Chevalier, M. Thoby-Brisson, Sigh and eupnea rhythmogenesis involve  
474 distinct interconnected subpopulations: a combined computational and experimental study.  
475 *eNeuro* **2** (2015).
- 476 14. C. Morgado-Valle, J. C. Smith, J. Fernandez-Ruiz, L. Lopez-Meraz, L. Beltran-Parrazal,  
477 Modulation of inspiratory burst duration and frequency by bombesin in vitro. *Pflüg. Arch. -*  
478 *Eur. J. Physiol.* (2022) <https://doi.org/10.1007/s00424-022-02663-1> (February 7, 2022).

- 479 15. A. K. Tryba, *et al.*, Differential modulation of neural network and pacemaker activity  
480 underlying eupnea and sigh-breathing activities. *J. Neurophysiol.* **99**, 2114–2125 (2008).
- 481 16. A. Ruangkittisakul, *et al.*, Generation of eupnea and sighs by a spatiochemically organized  
482 inspiratory network. *J. Neurosci.* **28**, 2447–2458 (2008).
- 483 17. J. M. Ramirez, *et al.*, “Purinergic signaling mediates neuroglial interactions to generate  
484 sighs” (In Review, 2021) <https://doi.org/10.21203/rs.3.rs-294601/v1> (October 22, 2021).
- 485 18. C. A. Del Negro, C. Morgado-Valle, J. L. Feldman, Respiratory rhythm: an emergent  
486 network property? *Neuron* **Vol. 34**, 821–830 (2002).
- 487 19. F. Peña, M. A. Parkis, A. K. Tryba, J.-M. Ramirez, Differential Contribution of Pacemaker  
488 Properties to the Generation of Respiratory Rhythms during Normoxia and Hypoxia.  
489 *Neuron* **43**, 105–117 (2004).
- 490 20. C. A. Del Negro, Sodium and calcium current-mediated pacemaker neurons and respiratory  
491 rhythm generation. *J. Neurosci.* **25**, 446–453 (2005).
- 492 21. R. W. Pace, D. D. Mackay, J. L. Feldman, C. A. Del Negro, Role of persistent sodium  
493 current in mouse preBötzing Complex neurons and respiratory rhythm generation: Role  
494 of  $I_{NaP}$  in active preBötzing Complex neurons. *J. Physiol.* **580**, 485–496 (2007).
- 495 22. H. Koizumi, J. C. Smith, Persistent Na<sup>+</sup> and K<sup>+</sup>-Dominated Leak Currents Contribute to  
496 Respiratory Rhythm Generation in the Pre-Botzinger Complex In Vitro. *J. Neurosci.* **28**,  
497 1773–1785 (2008).
- 498 23. D. S. Borrus, C. Grover, G. D. Conradi Smith, C. A. Del Negro, Role of synaptic inhibition in  
499 the coupling of the respiratory rhythms that underlie eupnea and sigh behaviors. *eNeuro* **7**  
500 (2020).
- 501 24. C. A. Del Negro, K. Kam, J. A. Hayes, J. L. Feldman, Asymmetric control of inspiratory and  
502 expiratory phases by excitability in the respiratory network of neonatal mice *in vitro*:  
503 Asymmetric control of respiratory phases. *J. Physiol.* **587**, 1217–1231 (2009).
- 504 25. A. Doi, J.-M. Ramirez, State-dependent interactions between excitatory neuromodulators in  
505 the neuronal control of breathing. *J. Neurosci.* **30**, 8251–8262 (2010).
- 506 26. K. Kam, J. W. Worrell, W. A. Janczewski, Y. Cui, J. L. Feldman, Distinct inspiratory rhythm  
507 and pattern generating mechanisms in the preBötzing Complex. *J. Neurosci.* **33**, 9235–  
508 9245 (2013).
- 509 27. P. S. Kallurkar, C. Grover, M. C. D. Picardo, C. A. Del Negro, Evaluating the burstlet theory  
510 of inspiratory rhythm and pattern generation. *eNeuro* **7** (2020).
- 511 28. S. Ashhad, J. L. Feldman, Emergent elements of inspiratory rhythmogenesis: network  
512 synchronization and synchrony propagation. *Neuron* **106**, 482-497.e4 (2020).
- 513 29. P. Li, *et al.*, The peptidergic control circuit for sighing. *Nature* **530**, 293–297 (2016).

- 514 30. A. G. Huxtable, *et al.*, Glia contribute to the purinergic modulation of inspiratory rhythm-  
515 generating networks. *J. Neurosci.* **30**, 3947–3958 (2010).
- 516 31. Y. Okada, *et al.*, Preinspiratory calcium rise in putative pre-Bötzinger complex astrocytes:  
517 Preinspiratory astrocytes in pre-Bötzinger complex. *J. Physiol.* **590**, 4933–4944 (2012).
- 518 32. V. Rajani, Y. Zhang, A. L. Revill, G. D. Funk, The role of P2Y1 receptor signaling in central  
519 respiratory control. *Respir. Physiol. Neurobiol.* **226**, 3–10 (2016).
- 520 33. J. Bouvier, *et al.*, Hindbrain interneurons and axon guidance signaling critical for breathing.  
521 *Nat. Neurosci.* **13**, 1066–1074 (2010).
- 522 34. P. A. Gray, *et al.*, Developmental origin of preBötzinger complex respiratory neurons. *J.*  
523 *Neurosci.* **30**, 14883–14895 (2010).
- 524 35. N. C. Vann, F. D. Pham, K. E. Dorst, C. A. Del Negro, Dbx1 pre-Bötzinger Complex  
525 interneurons comprise the core inspiratory oscillator for breathing in unanesthetized adult  
526 mice. *eNeuro* **5** (2018).
- 527 36. G. D. Funk, J. C. Smith, J. L. Feldman, Generation and transmission of respiratory  
528 oscillations in medullary slices: role of excitatory amino acids. *J. Neurophysiol.* **70**, 1497–  
529 1515 (1993).
- 530 37. J. Keizer, Y. X. Li, S. Stojilković, J. Rinzel, InsP3-induced Ca<sup>2+</sup> excitability of the  
531 endoplasmic reticulum. *Mol. Biol. Cell* **6**, 945–951 (1995).
- 532 38. D. D. Friel, H. J. Chiel, Calcium dynamics: analyzing the Ca<sup>2+</sup> regulatory network in intact  
533 cells. *Trends Neurosci.* **31**, 8–19 (2008).
- 534 39. I. Ramos-Álvarez, *et al.*, Insights into bombesin receptors and ligands: Highlighting recent  
535 advances. *Peptides* **72**, 128–144 (2015).
- 536 40. K. Ptak, *et al.*, Raphe Neurons Stimulate Respiratory Circuit Activity by Multiple  
537 Mechanisms via Endogenously Released Serotonin and Substance P. *J. Neurosci.* **29**,  
538 3720–3737 (2009).
- 539 41. J. Gafni, *et al.*, Xestospongins: Potent Membrane Permeable Blockers of the Inositol 1,4,5-  
540 Trisphosphate Receptor. *Neuron* **19**, 723–733 (1997).
- 541 42. P. D. Smet, *et al.*, Xestospongins C is an equally potent inhibitor of the inositol 1,4,5-  
542 trisphosphate receptor and the endoplasmic-reticulum Ca<sup>2+</sup> pumps. *Cell Calcium* **26**, 9–13  
543 (1999).
- 544 43. P. Morquette, *et al.*, An astrocyte-dependent mechanism for neuronal rhythmogenesis. *Nat.*  
545 *Neurosci.* **18**, 844–854 (2015).
- 546 44. National Research Council (U.S.), Institute for Laboratory Animal Research (U.S.), National  
547 Academies Press (U.S.), Eds., *Guide for the care and use of laboratory animals*, 8th ed  
548 (National Academies Press, 2011).

- 549 45. F. Bielle, *et al.*, Multiple origins of Cajal-Retzius cells at the borders of the developing  
550 pallium. *Nat. Neurosci.* **8**, 1002–1012 (2005).
- 551 46. T. L. Daigle, *et al.*, A suite of transgenic driver and reporter mouse lines with enhanced  
552 brain-cell-type targeting and functionality. *Cell* **174**, 465-480.e22 (2018).
- 553 47. A. Kottick, C. A. Martin, C. A. Del Negro, Fate mapping neurons and glia derived from Dbx1-  
554 expressing progenitors in mouse preBötzinger complex. *Physiol. Rep.* **5**, e13300 (2017).
- 555 48. A. Ruangkittisakul, B. Panaitescu, K. Ballanyi, K(+) and Ca<sup>2</sup>(+) dependence of inspiratory-  
556 related rhythm in novel “calibrated” mouse brainstem slices. *Respir. Physiol. Neurobiol.*  
557 **175**, 37–48 (2011).
- 558 49. A. Ruangkittisakul, A. Kottick, M. C. D. Picardo, K. Ballanyi, C. A. Del Negro, Identification of  
559 the pre-Bötzinger complex inspiratory center in calibrated “sandwich” slices from newborn  
560 mice with fluorescent Dbx1 interneurons. *Physiol. Rep.* **2**, e12111 (2014).
- 561 50. G. D. Funk, J. J. Greer, The rhythmic, transverse medullary slice preparation in respiratory  
562 neurobiology: Contributions and caveats. *Respir. Physiol. Neurobiol.* **186**, 236–253 (2013).

## 563 **FIGURE LEGENDS**

564 Figure 1: Differential modulation of inspiratory and sigh rhythm frequency. (A) preBötC field  
565 recording capturing inspiratory and sigh rhythms at 9 and 3 mM extracellular  $K^+$  concentration in  
566 the aCSF ( $[K^+]_o$ ). Sigh events are indicated by  $\sigma$ . (B) Inspiratory and sigh frequencies plotted as  
567 a function of aCSF  $[K^+]_o$ . Grey circles show individual slices; red squares show mean frequency  
568 ( $N = 19$  inspiratory,  $N = 13$  sigh). (C) Mean inspiratory frequency plotted versus corresponding  
569 mean sigh frequency for different aCSF  $[K^+]_o$ . (D) XII nerve recordings in control and after  
570 Neuromedin-B (NMB) application. (E) Event (inspiratory) and sigh frequencies plotted at  
571 different NMB doses. Grey circles represent individual slices; red squares show mean frequency  
572 ( $N = 8$ ). (F) Event (inspiratory) and sigh frequencies plotted at different NMB doses.

573 Figure 2: Inspiratory and sigh rhythms in the preBötC model system. (A) At left, time series of  
574 state variables ( $\alpha, s, \theta, c, c_{tot}$ ). Top right, inspiratory burst trajectory in  $(s, \theta)$  phase space.  
575 Bottom right, sigh trajectory in  $(c, c_{tot})$  phase diagram showing  $c$  and  $c_{tot}$  nullclines; \* marks  
576 onset of the sigh burst. (B) Schematic of the  $Ca^{2+}$  subsystem showing the critical channels and  
577 pumps. Dashed arrows show  $Ca^{2+}$  fluxes. (C) Trajectory in  $(\alpha, s, \theta)$  phase space during  
578 inspiratory burst events (black) and a sigh event (red). (D,E) Inspiratory and sigh frequencies for  
579 different baseline excitabilities for the network (D) or different maximum  $IP_3R$  conductance  
580 ( $v_{ip3r}$ ) (E). Red squares show single simulations; cyan line from linear regression.

581 Figure 3: Investigating the role of SERCA pumps in sigh generation. (A) Progressive attenuation  
582 of SERCA pump in the model. Filled circles on the  $\int \alpha$  axis show area of  $\alpha$  for each burst.  
583 Dashed line shows average sigh area during control conditions for reference. (B) preBötC field  
584 recordings before and 15 min after application of 10  $\mu M$  thapsigargin. Sighs are denoted by  $\sigma$ .  
585 (C,D) Group data showing average sigh frequency (area) during control (C), thapsigargin (Th),  
586 and washout (W) ( $N = 9$  frequency,  $N = 5$  area); data in normalized units (NU) also shown. (E)  
587 XII nerve recording during 100  $\mu M$  thapsigargin application and washout. (F) Sigh frequency  
588 during control (C), thapsigargin (Th), and washout (W) ( $N=4$ ). (G) Inter-event interval  
589 distributions.

590 Figure 4: Investigating the role of  $IP_3R$ s in sigh generation. (A) Progressive  $IP_3R$  blockade in the  
591 model. Filled circles on the  $\int \alpha$  axis show area of  $\alpha$  for each burst. Dashed grey line shows  
592 average sigh area during control conditions for reference. (B) XII nerve recordings before and  
593 during application of 1  $\mu M$  xestospongine. Sighs are denoted by  $\sigma$ . (C) Sigh frequency during

594 control (C), xestospongine (X) application, and washout (W) (N=4). (D) Inter-event interval  
595 distributions.  
596

597 FIGURE 1

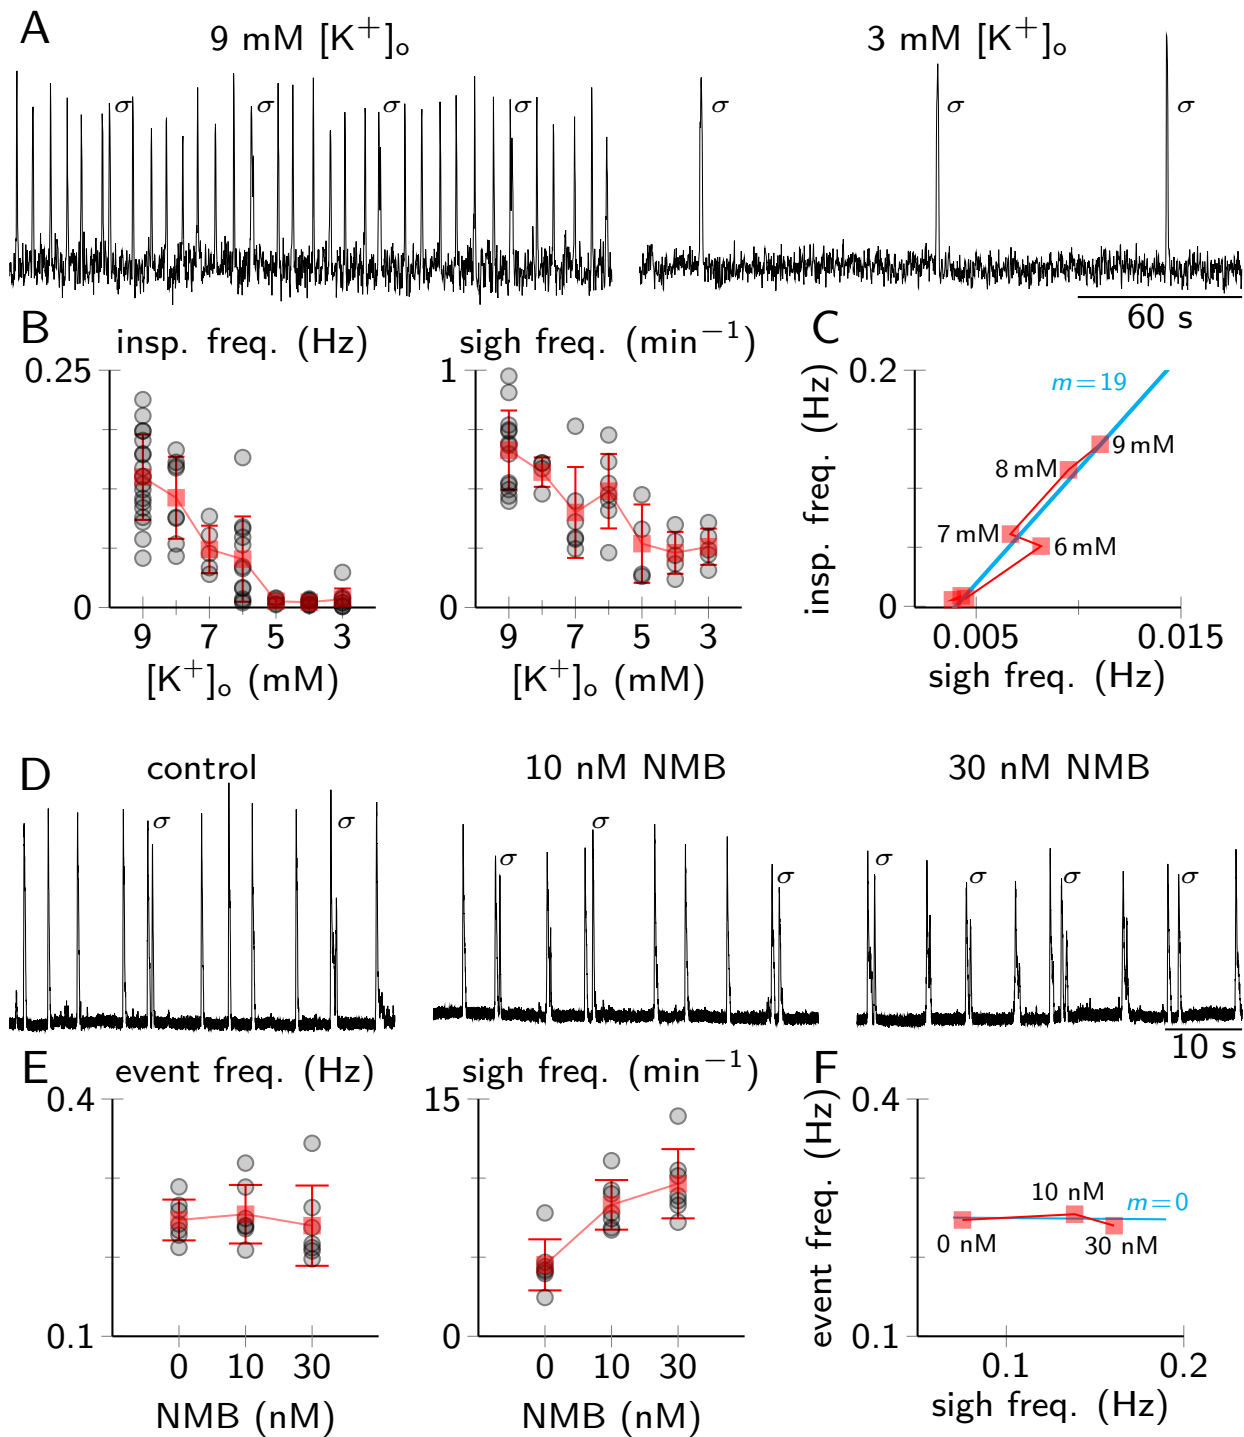

598

599

600 FIGURE 2

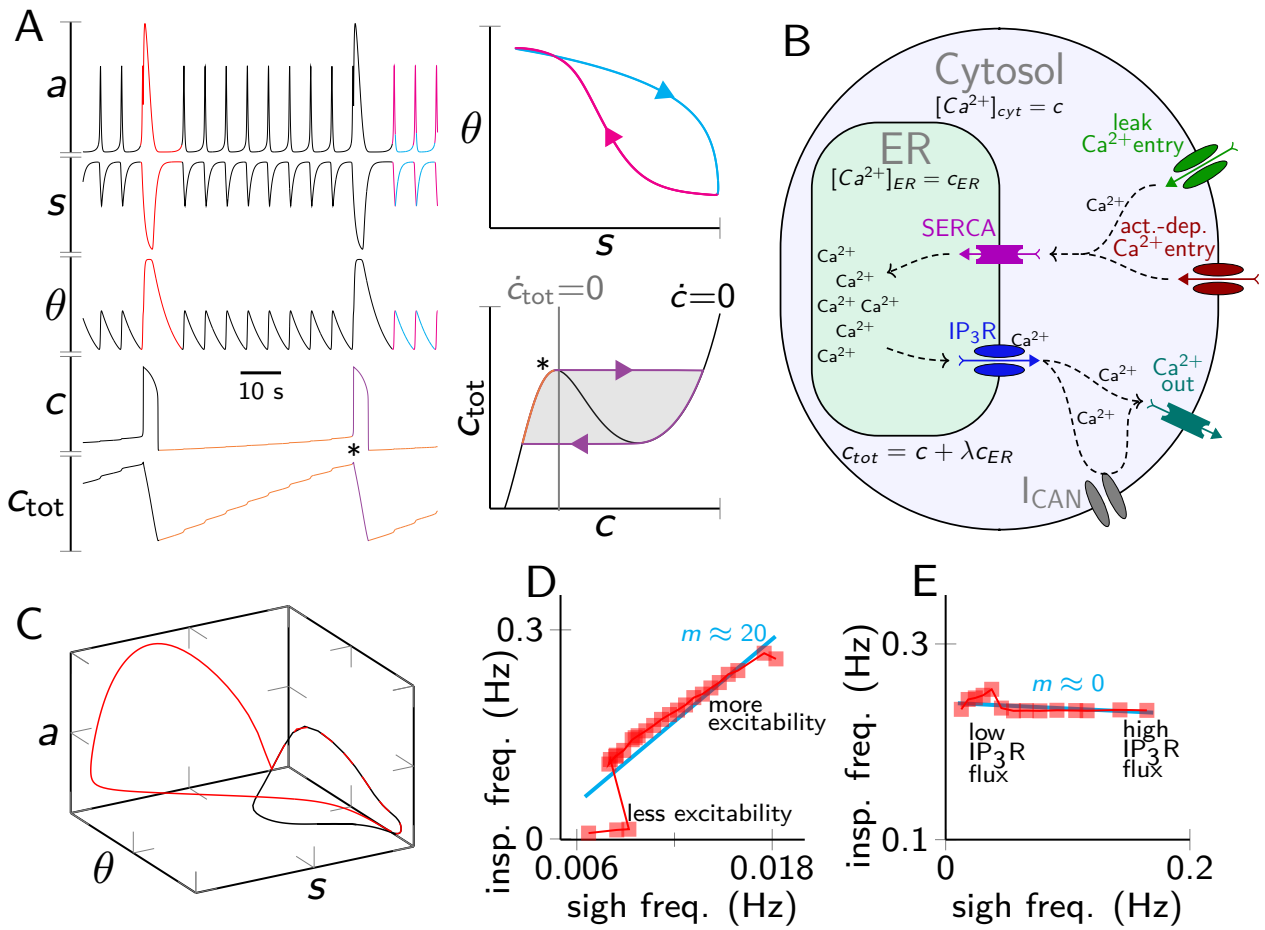

601

602



603 FIGURE 3

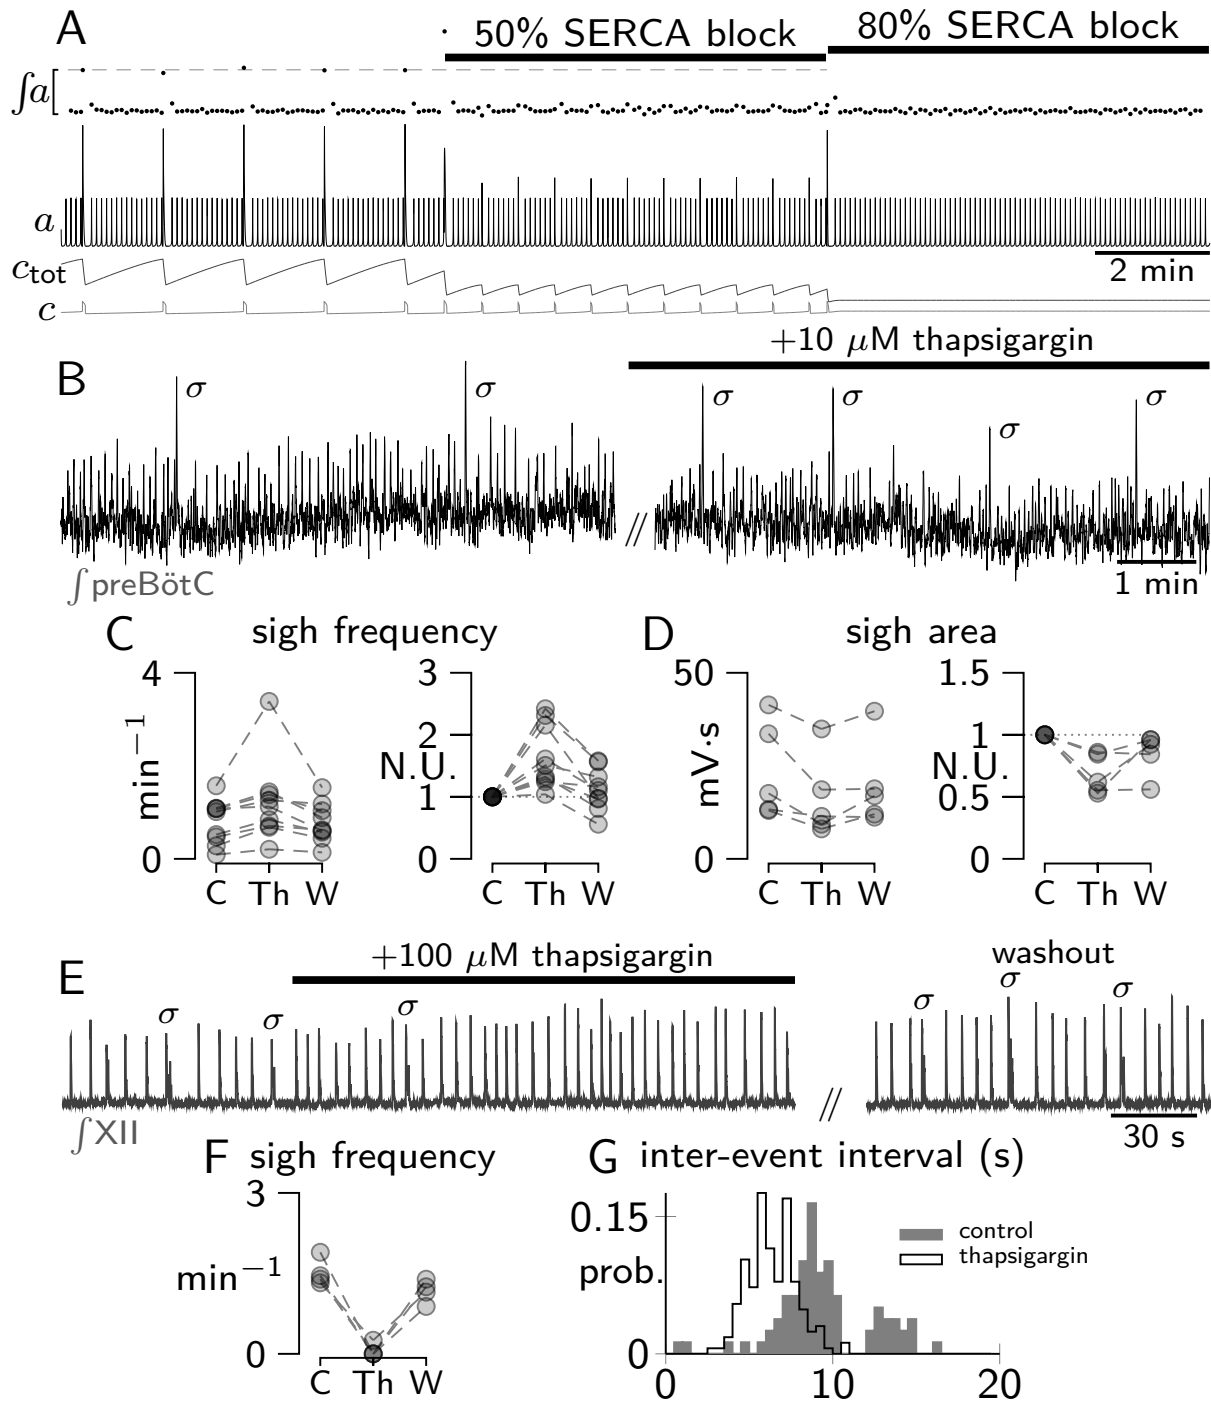

604

605

606 FIGURE 4

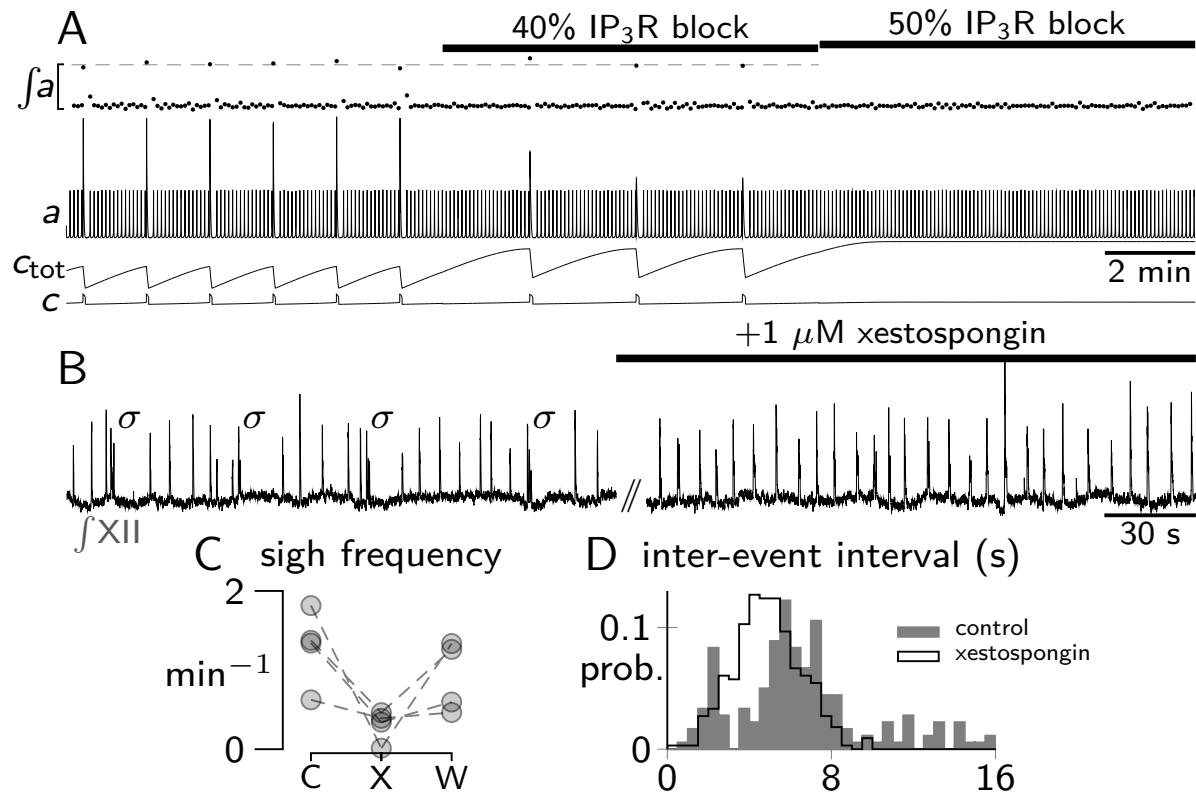

607
